# Supplementary material for: Antibacterial and Antioxidant Properties of the Leaves and Stem Essential Oils ofJatropha gossypifoliaL.
Source: Hindawi journal article supplement (doi:10.1155/2016/9392716), 2016-01-01
Supplement: f1 [file 9392716.f1.pdf]

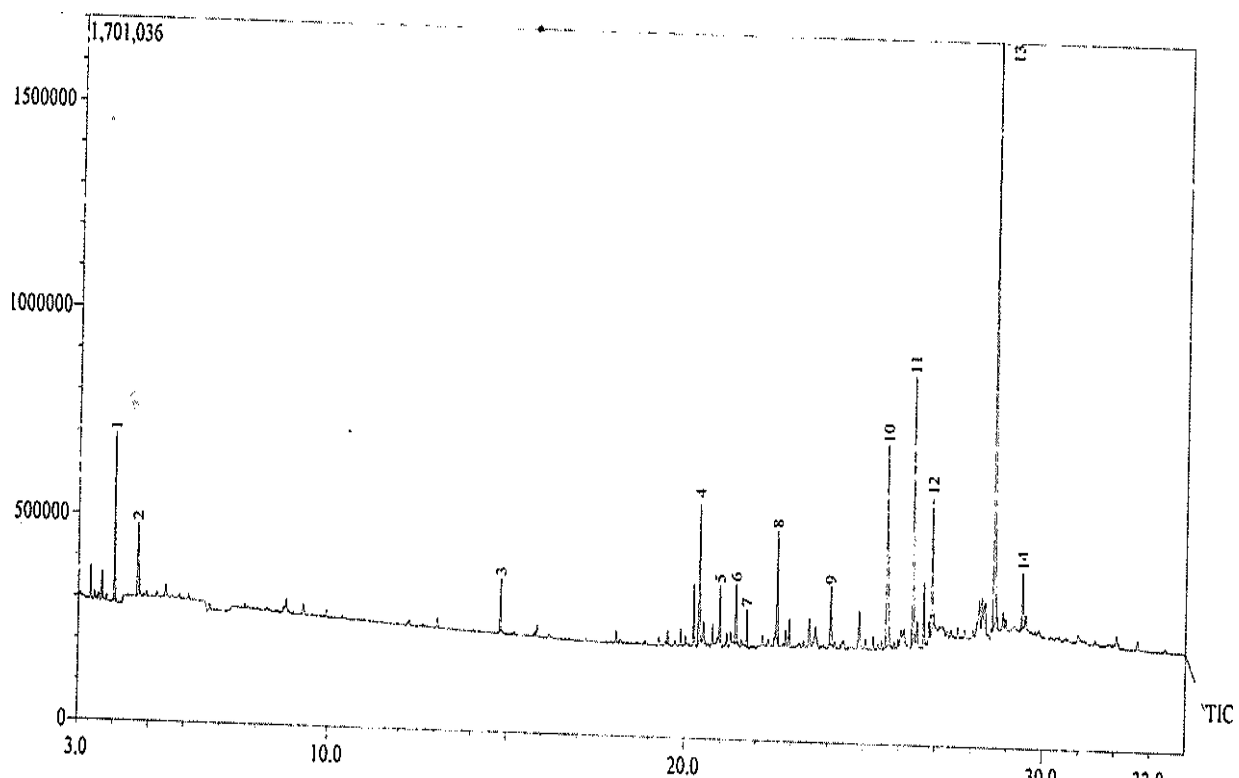

Figure 5: Total ion chromatogram of the leaves essential oil of *J. gossypifolia*

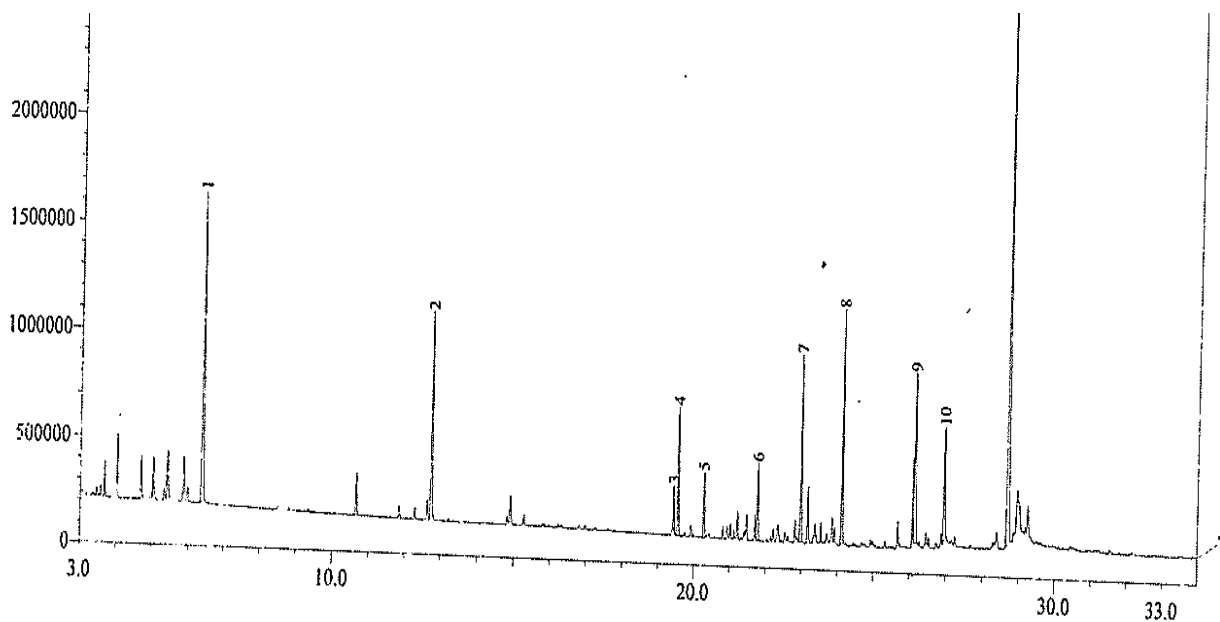

Figure 6: Total ion chromatogram of the stem essential oil of *J. gossypifolia*
